# Supplementary material for: Investigation of Possible Correlation Between Retinal Neurovascular Biomarkers and Early Cognitive Impairment in Patients With Chronic Kidney Disease
Source: PubMed Central journal article supplement — Transl Vis Sci Technol. 2021 Dec 13;10(14):9. doi: 10.1167/tvst.10.14.9 (PMC8684295; doi:10.1167/tvst.10.14.9), 2021-12-13
Supplement: tvst-10-14-9_s001.pdf [file tvst-10-14-9_s001.pdf]

## Supplementary Material

**Table S1.** Simple linear regression model for evaluating the association between MMSE score and anti-hypertensive drugs.

|                                 | Number of patients | Simple linear regression model <sup>a</sup> |                |         |
|---------------------------------|--------------------|---------------------------------------------|----------------|---------|
|                                 | n (%)              | Coefficient                                 | 95% CI         | P value |
| <b>ACEI / ARB</b>               | 107 (61)           | 0.168                                       | -0.464 – 0.800 | 0.601   |
| <b>Calcium channel blockers</b> | 75 (42)            | -0.320                                      | -0.947 – 0.306 | 0.315   |
| <b>Beta blockers</b>            | 62 (35)            | -0.295                                      | -0.954 – 0.363 | 0.377   |
| <b>Diuretics</b>                | 31 (18)            | 0.052                                       | -0.778 – 0.883 | 0.901   |
| <b>Alpha 1 blockers</b>         | 16 (9)             | -0.178                                      | -1.256 – 0.901 | 0.746   |
| <b>Alpha 2 agonists</b>         | 2 (1)              | 0.482                                       | -2.453 – 3.417 | 0.746   |
| <b>Vasodilators</b>             | 8 (5)              | -0.1595                                     | -1.651 – 1.332 | 0.833   |

<sup>a</sup> The *P* values were calculated using a linear regression model after adjustment for years of education.

ACEI: angiotensin converting enzyme inhibitor; ARB: angiotensin receptor blocker.
